# Supplementary material for: Oligosilylated group 4 titanocenes in the oxidation state +3
Source: Royal Society of Chemistry journal article supplement (doi:10.1039/b910637e), 2009-01-01
Supplement: b910637e.pdf [file b910637e.pdf]

**Table S-1.** Crystallographic information

|                                            | <b>1</b>                                                           | <b>3</b>                                                                                         | <b>4</b>                                                                           | <b>5</b>                                                                                          |
|--------------------------------------------|--------------------------------------------------------------------|--------------------------------------------------------------------------------------------------|------------------------------------------------------------------------------------|---------------------------------------------------------------------------------------------------|
| Empirical formula                          | C <sub>22</sub> H <sub>34</sub> Cl <sub>2</sub> KO <sub>6</sub> Ti | C <sub>79</sub> H <sub>167</sub> K <sub>2</sub> O <sub>12</sub> Si <sub>16</sub> Ti <sub>2</sub> | C <sub>63</sub> H <sub>129</sub> K <sub>2</sub> O <sub>15</sub> Si <sub>9</sub> Ti | C <sub>190</sub> H <sub>349</sub> K <sub>6</sub> O <sub>36</sub> Si <sub>24</sub> Ti <sub>3</sub> |
| M <sub>w</sub>                             | 552.39                                                             | 1932.57                                                                                          | 1505.57                                                                            | 4262.15                                                                                           |
| Temperature [K]                            | 100(2)                                                             | 100(2)                                                                                           | 100(2)                                                                             | 100(2)                                                                                            |
| Size [mm]                                  | 0.38x0.30x0.22                                                     | 0.32x0.25x0.18                                                                                   | 0.46x0.33x0.20                                                                     | 0.37x0.30x0.20                                                                                    |
| Crystal system                             | monoclinic                                                         | triclinic                                                                                        | monoclinic                                                                         | monoclinic                                                                                        |
| Space group                                | P2(1)/c                                                            | P-1                                                                                              | P2(1)/n                                                                            | C2/c                                                                                              |
| a [Å]                                      | 11.410(2)                                                          | 13.606(3)                                                                                        | 11.572(2)                                                                          | 25.623(5)                                                                                         |
| b [Å]                                      | 11.789(2)                                                          | 19.608(4)                                                                                        | 34.572(7)                                                                          | 24.455(5)                                                                                         |
| c [Å]                                      | 19.048(4)                                                          | 21.586(4)                                                                                        | 21.520(4)                                                                          | 40.583(8)                                                                                         |
| α [°]                                      | 90                                                                 | 74.40(3)                                                                                         | 90                                                                                 | 90                                                                                                |
| β [°]                                      | 94.45(3)                                                           | 79.95(3)                                                                                         | 102.46(3)                                                                          | 106.02(3)                                                                                         |
| γ [°]                                      | 90                                                                 | 89.22(3)                                                                                         | 90                                                                                 | 90                                                                                                |
| V [Å <sup>3</sup> ]                        | 2554(9)                                                            | 5458(2)                                                                                          | 8407(3)                                                                            | 24443(8)                                                                                          |
| Z                                          | 4                                                                  | 2                                                                                                | 4                                                                                  | 4                                                                                                 |
| ρ <sub>calc</sub> [gcm <sup>-3</sup> ]     | 1.436                                                              | 1.176                                                                                            | 1.190                                                                              | 1.158                                                                                             |
| Absorption coefficient [mm <sup>-1</sup> ] | 0.742                                                              | 0.446                                                                                            | 0.383                                                                              | 0.375                                                                                             |
| F(000)                                     | 1156                                                               | 2086                                                                                             | 3252                                                                               | 9172                                                                                              |
| θ range                                    | 1.79<θ<25.00                                                       | 1.25<θ<25.00                                                                                     | 1.13<θ<26.38                                                                       | 1.04<θ<24.00                                                                                      |
| Reflections collected/unique               | 18001/4495                                                         | 19068/19068                                                                                      | 65949/17177                                                                        | 80407/19181                                                                                       |

|                                                |                        |                        |                        |                         |
|------------------------------------------------|------------------------|------------------------|------------------------|-------------------------|
| Completeness to $\theta$ [%]                   | 100                    | 99.1                   | 99.9                   | 99.9                    |
| Data/restraints/parameters                     | 4495/0/289             | 19068/0/1012           | 17177/0/829            | 19181/37/1160           |
| Goodness of fit on $F^2$                       | 1.03                   | 1.02                   | 1.03                   | 1.02                    |
| Final R indices [ $I > 2\sigma(I)$ ]           | R1=0.053,<br>wR2=0.107 | R1=0.075,<br>wR2=0.160 | R1=0.058,<br>wR2=0.120 | R1=0.123,<br>wR2=0.299  |
| R indices (all data)                           | R1=0.075,<br>wR2=0.118 | R1=0.120,<br>wR2=0.178 | R1=0.096,<br>wR2=0.134 | R1=0.1642,<br>wR2=0.333 |
| Largest diff. Peak/hole [ $e^-/\text{\AA}^3$ ] | 1.02/-0.85             | 2.11/-0.42             | 1.03/-0.59             | 2.11/-1.19              |

---

Crystallographic data (excluding structure factors) for the structures reported in this paper have been deposited with the Cambridge Crystallographic Data Center as supplementary publication no. CCDC-705716 (**1**), 705717 (**3**), 705719 (**4**), and 705718 (**5**). Copies of the data can be obtained free of charge at: <http://www.ccdc.cam.ac.uk/products/csd/request/>.

Compound **1** was crystallized from a mixture of pentane and toluene at low temperature (-60 to -70). The compound can be obtained in almost quantitative yield when  $\text{Cp}_2\text{TiCl}_2$  is reacted with 0.5 equiv of the 18-crown-6 adduct of 1,4-di-potassio-1,1,4,4-tetrakis-(trimethylsilyl)-tetramethyl-tetra-silane. The crown ether part of the structure of **1** contains some disorder.

The asymmetric unit of the structure of compound **3** contains two independent molecules of **3**. While in one of these molecules the potassium ion is located exactly centered above a Cp unit this is not true for the second molecule, where the potassium is located above one of the Cp carbons. In addition the asymmetric unit contains a poorly resolved benzene molecule which is distributed over two sites and can not be refined anisotropically.

The asymmetric unit of the structure of compound **4** contains an isolated anionic  $[\text{Cp}_2\text{Ti}\{\text{Si}(\text{SiMe}_3)_2\text{SiMe}_2\}_2]$  fragment, a cationic  $[\text{Cp}(18\text{-crown-6}\cdot\text{K})_2]$  unit and in addition a 18-crown-6 crown ether molecule.

The crystal quality of compound **5** was poor. This is reflected by a value for R1 of 0.12 (at 48 degrees for  $2\theta$ ). The asymmetric unit contains two independent units of  $[\text{Cp}_2\text{Ti}\{\text{Si}(\text{SiMe}_3)(\text{SiMe}_2)_2\}_2]$ , three  $[\text{Cp}(18\text{-crown-6}\cdot\text{K})_2]$ , a  $\text{Cp}^-$ , a benzene and a toluene molecule. The crown ethers are strongly disordered so that 37 restraints were used to treat this disorder. The fact that the measurement was carried out at 100K indicates that the nature of the disorder is statistical and not dynamic.
